# Supplementary material for: Three-in-one: exploration of co-encapsulation of cabazitaxel, bicalutamide and chlorin e6 in new mixed cyclodextrin-crosslinked polymers
Source: Royal Society of Chemistry journal article supplement (doi:10.1039/d3ra01782f), 2023-01-01

## **Three-in-one: exploration of co-encapsulation of Cabazitaxel, Bicalutamide and Chlorin e6 in new mixed Cyclodextrin-crosslinked polymers.**

Elisabetta Pancani,<sup>3</sup> Daniele Veclani,<sup>1</sup> Marco Agnes,<sup>1</sup> Arianna Mazza,<sup>1</sup> Alessandro Venturini,<sup>1</sup> Milo Malanga,<sup>2</sup> Ilse Manet<sup>1\*</sup>

<sup>1</sup> Institute for Organic Synthesis and Photoreactivity, National Research Council, Via Gobetti 101, 40129 Bologna, Italy

<sup>2</sup> Previous affiliation: CycloLab, Cyclodextrin R&D Ltd., Budapest, Hungary

Current affiliation: CarboHyde Zrt., Budapest, Hungary

<sup>3</sup> Previous affiliation: Institute for Organic Synthesis and Photoreactivity, National Research Council, Via Gobetti 101, 40129 Bologna, Italy

Current affiliation: Advanced Accelerator Applications, A Novartis Company, via Ribes 5, 10010 Ivrea, Italy

### Electronic Supplementary Information

## 1) Synthesis of the polymer

Scheme 1 below shows the reaction conditions for the synthesis of the polymers in alkaline aqueous solutions.

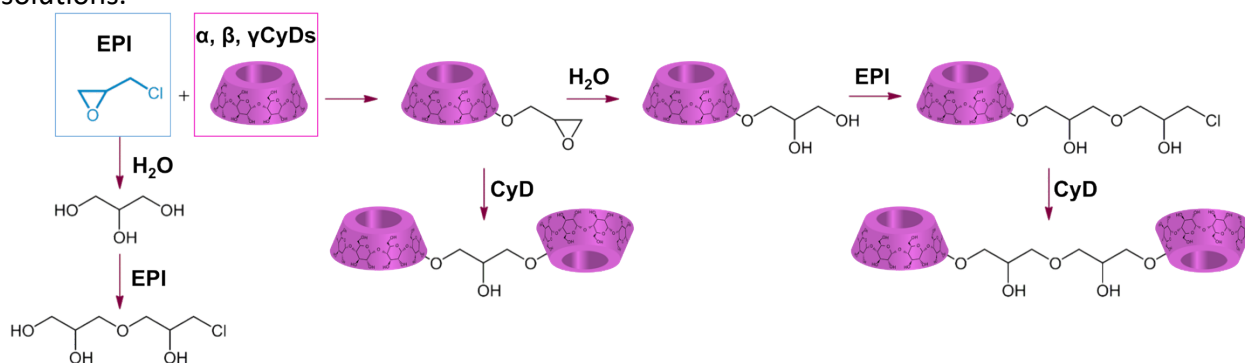

## 2) Solubility of CBX

Figure S1: Spectra of CBX of the dissolution experiment with different amounts of solid kept stirring for 36 hrs (solid line) and 5 days (dashes).

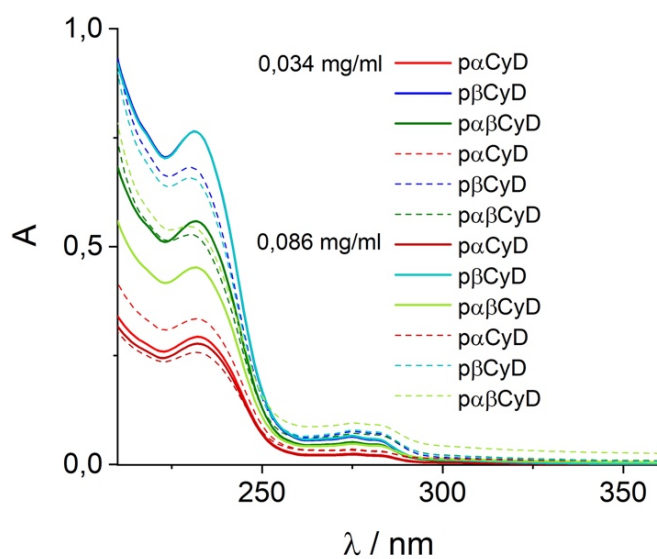

## 3) Solubility of BIC

Figure S2a: 10 mg/ml of polymer with 0,026 mg/ml solid drug amount; fluorescence spectra in 1 cm cuvet of 10x diluted solutions exciting at 270 nm in isosbestic point.

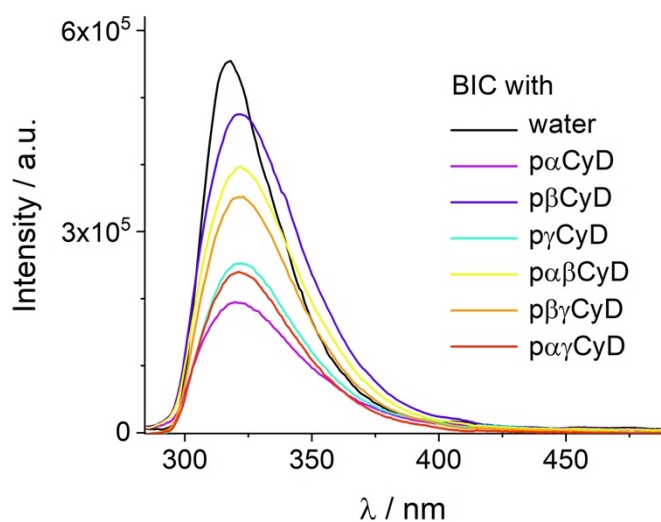

Table S1: the fluorescence lifetime, relative amplitude and average lifetime of BIC in the aqueous solutions of the different polymers

|               | $\tau_j / \text{ns}$ | $\alpha_j$    | $\tau_{\text{av}} / \text{ns}$ |
|---------------|----------------------|---------------|--------------------------------|
| <b>water</b>  | 0,16                 |               |                                |
| <b>pγCyD</b>  | 0,35 and 2,1         | 0,99 and 0,01 | 0,36                           |
| <b>pβγCyD</b> | 0,36 and 1,8         | 0,99 and 0,01 | 0,38                           |
| <b>pαγCyD</b> | 0,35 and 2,6         | 0,99 and 0,01 | 0,38                           |
| <b>pαCyD</b>  | 0,3 and 3,7          | 0,99 and 0,01 | 0,31                           |
| <b>pβCyD</b>  | 0,38 and 3,4         | 0,99 and 0,01 | 0,39                           |
| <b>pαβCyD</b> | 0,35 and 2,8         | 0,99 and 0,01 | 0,37                           |

Figure S2b: Absorption spectra of BIC of the dissolution experiment with different amounts of solid kept stirring for 36 hrs (solid line) and 5 days (dashes).

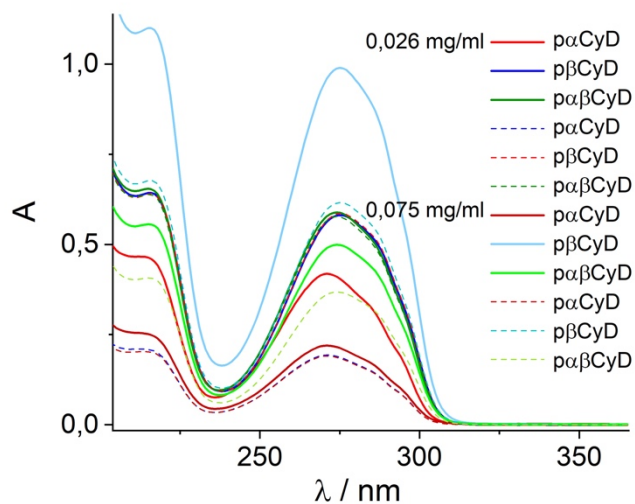

**4) Calibration curves of the drugs BIC and CBX to determine the molar absorption coefficient**  
 The graphs in Figure S3 show the absorption and CD spectra of drug solutions in 1 cm cuvet that were obtained preparing films from ethanolic solutions with known drug amount subsequently dissolved with aqueous carrier solutions containing **10 mg/ml polymer** kept stirring for 48 hrs. The spectra were corrected for the absorption or CD signal of the empty polymer. We plotted the absorbance at selected wavelengths as a function of the drug concentration to obtain the molar absorption coefficient upon linear fitting of the data. The blue BIC curves in a-c and the green curves in d-e refer to BIC and CBX in water, respectively.

Figure S3

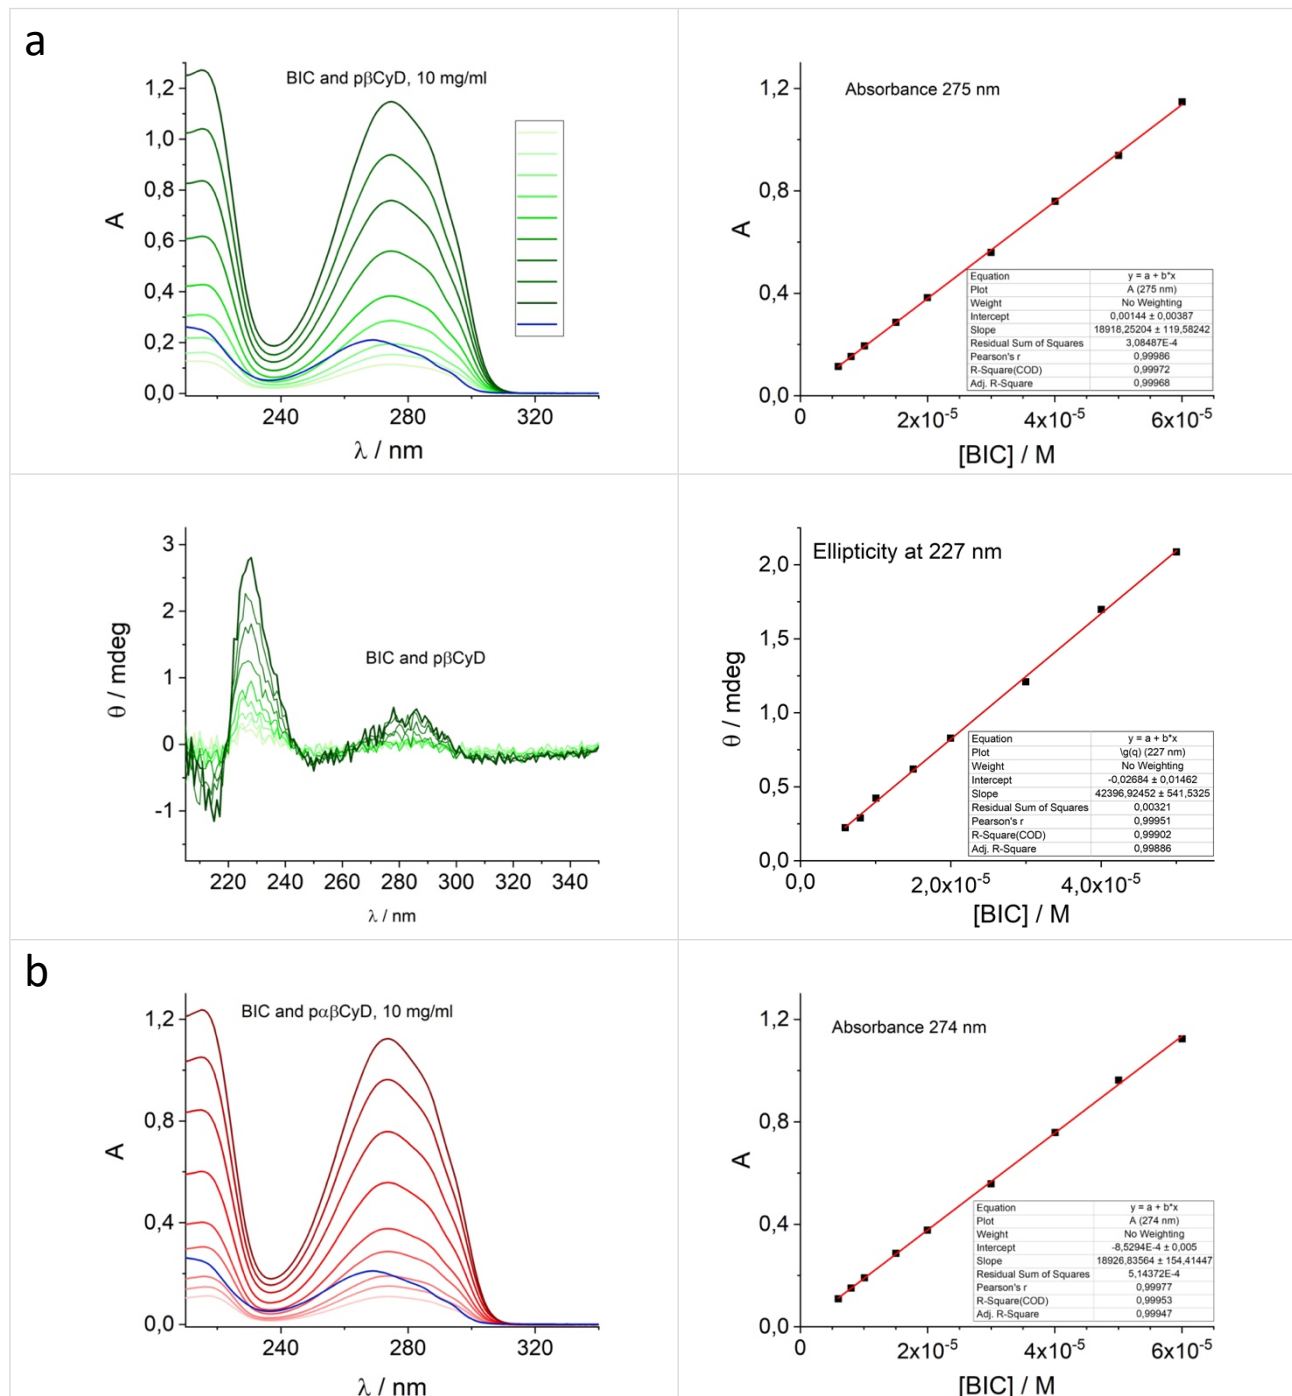

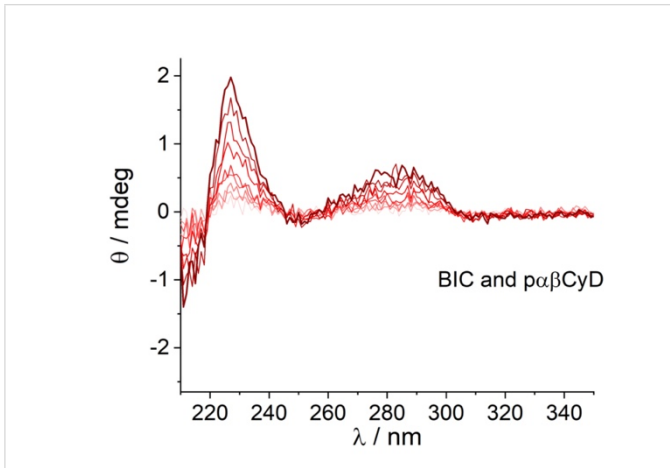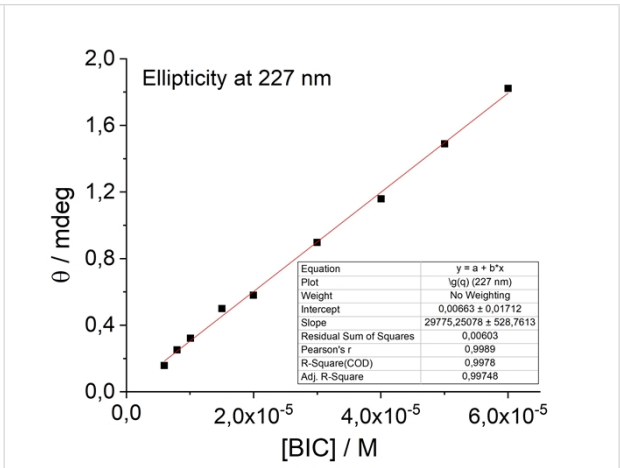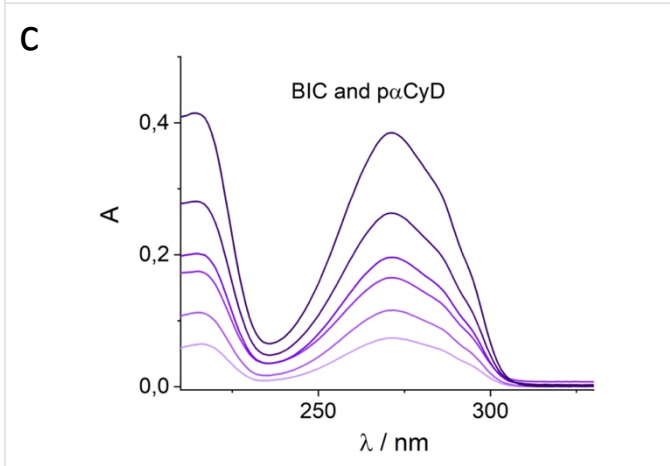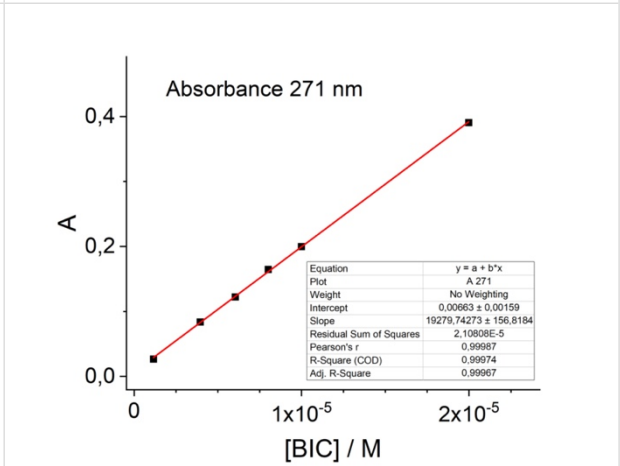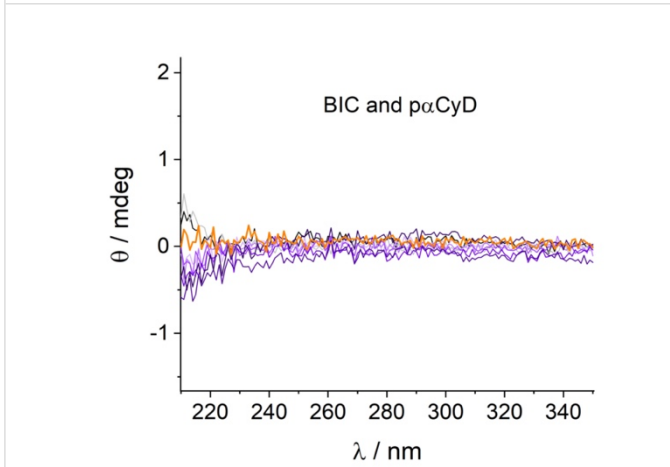

Not available

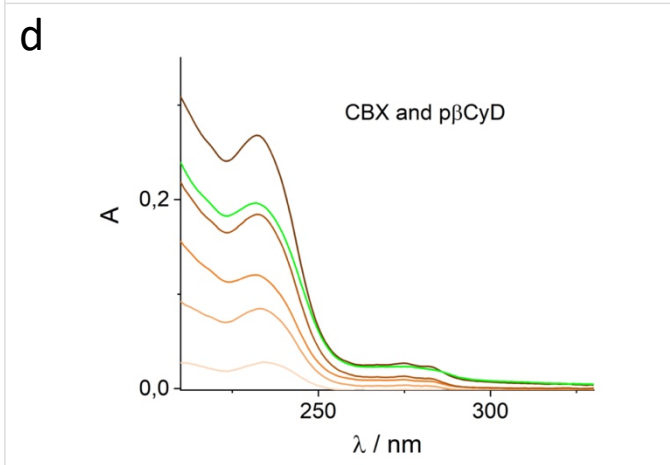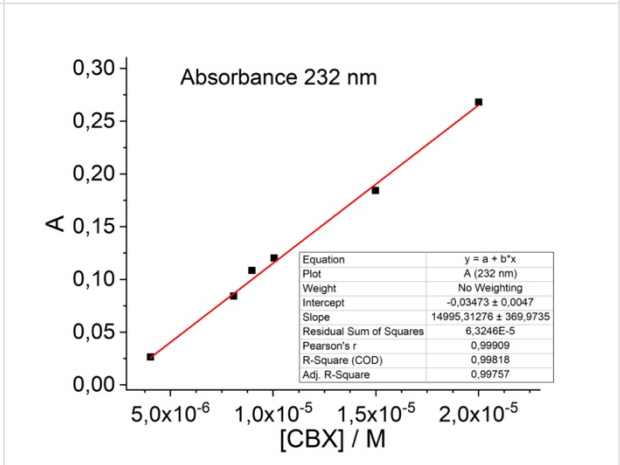

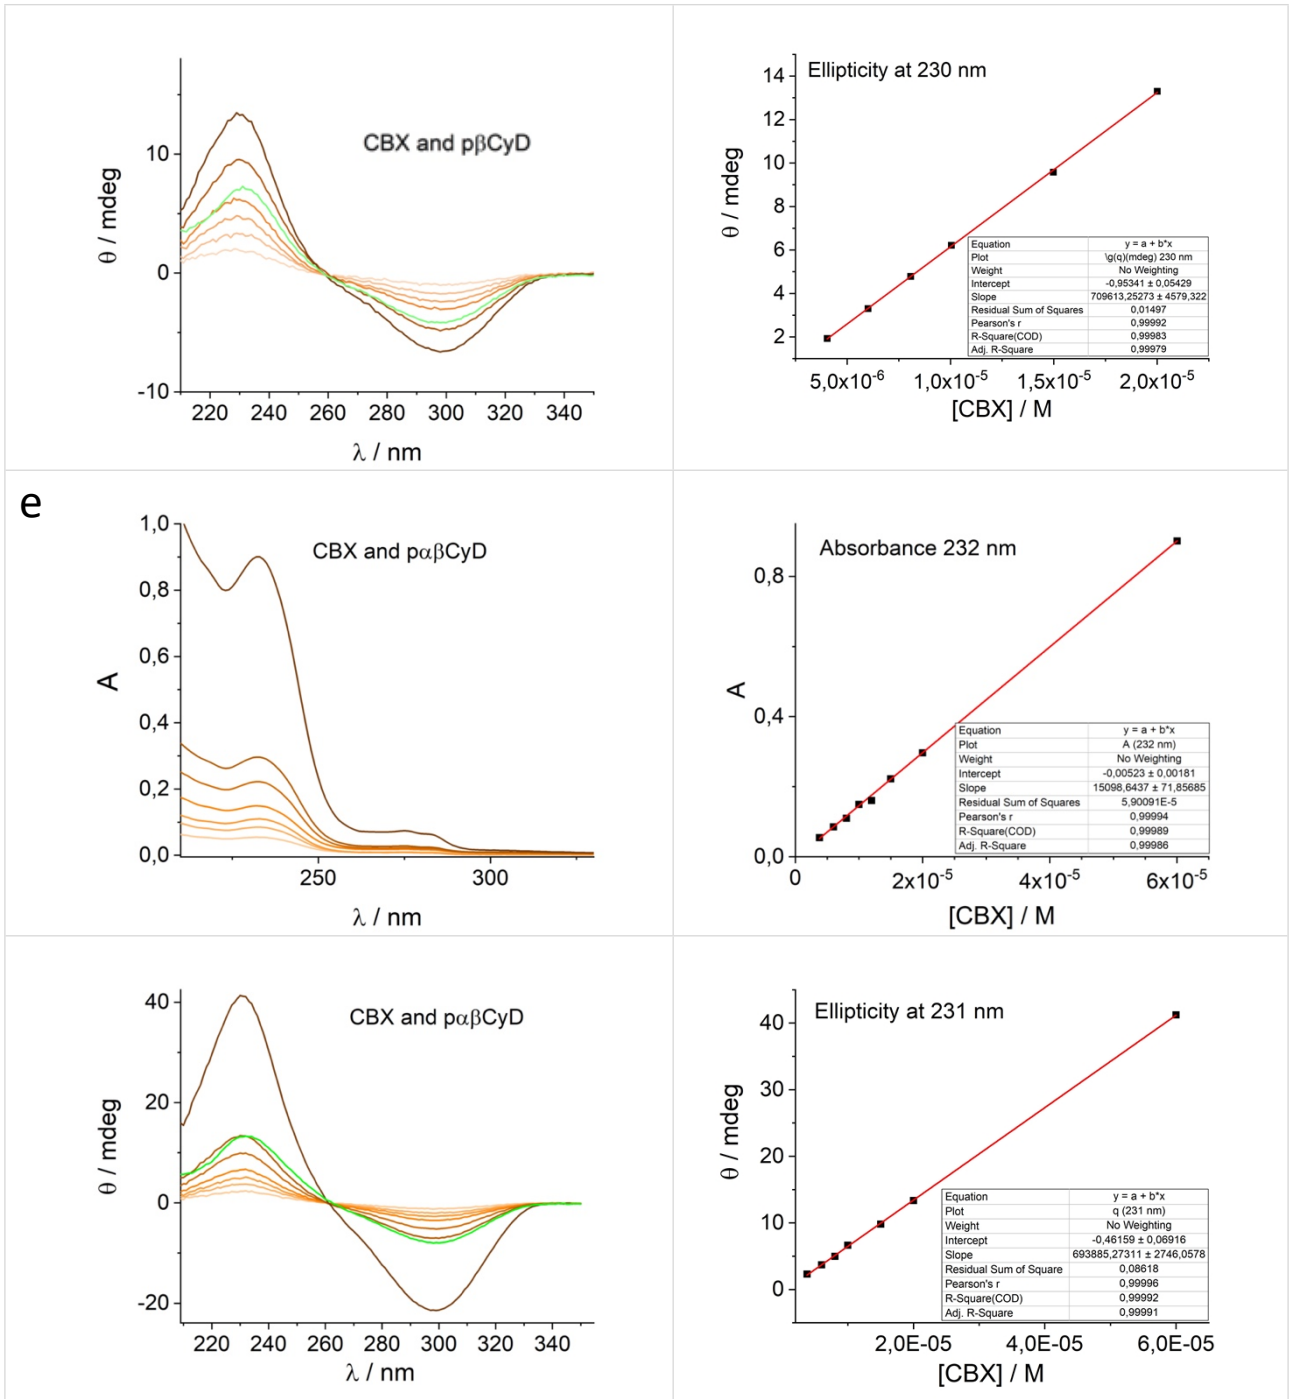

5) Titration Fluorescence spectra to determine the binding constants of BIC in  $\rho\alpha\text{CyD}$  and  $\rho\alpha\beta\text{CyD}$

Figure S4

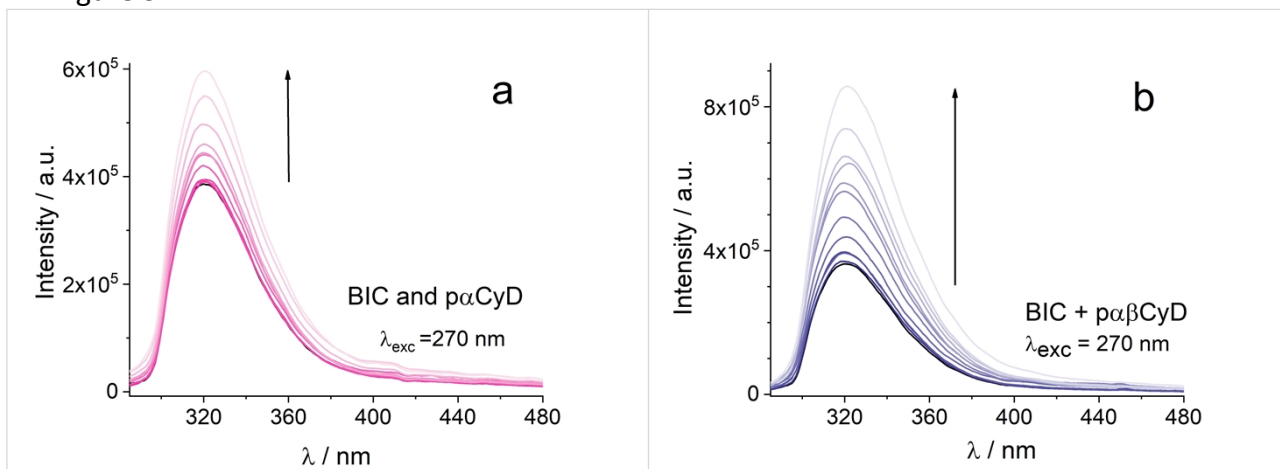

Titration Fluorescence spectra used to define the binding model and calculate the binding constants of BIC with the selected polymers;  $[\text{BIC}] = 4 \mu\text{M}$ ; for the polymers: (a) 4-700  $\mu\text{M}$   $[\alpha\text{CyD}]$ ; (b) 6-350  $\mu\text{M}$   $[\alpha\beta\text{CyD}]$ .

Titration of BIC with the polymer  $\rho\beta\text{CyD}$ : (c) Comparison of the experimental and calculated fluorescence intensity values at selected wavelengths; (d) species distribution vs total  $\beta\text{CyD}$  concentration and (e) calculated spectra of free and complexed BIC.

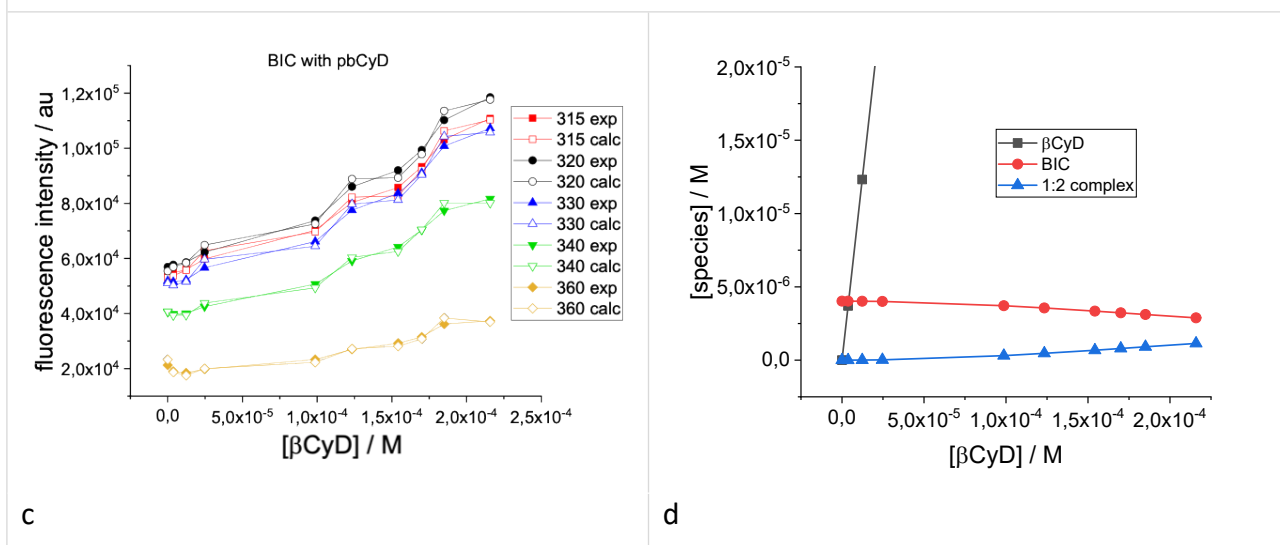

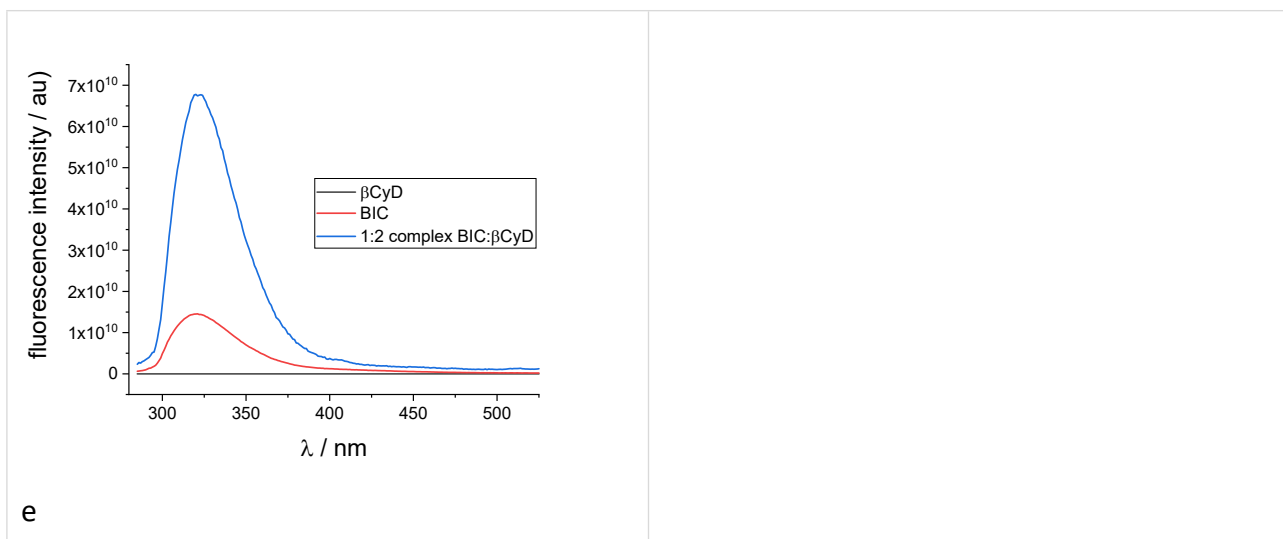

6) DFT calculations

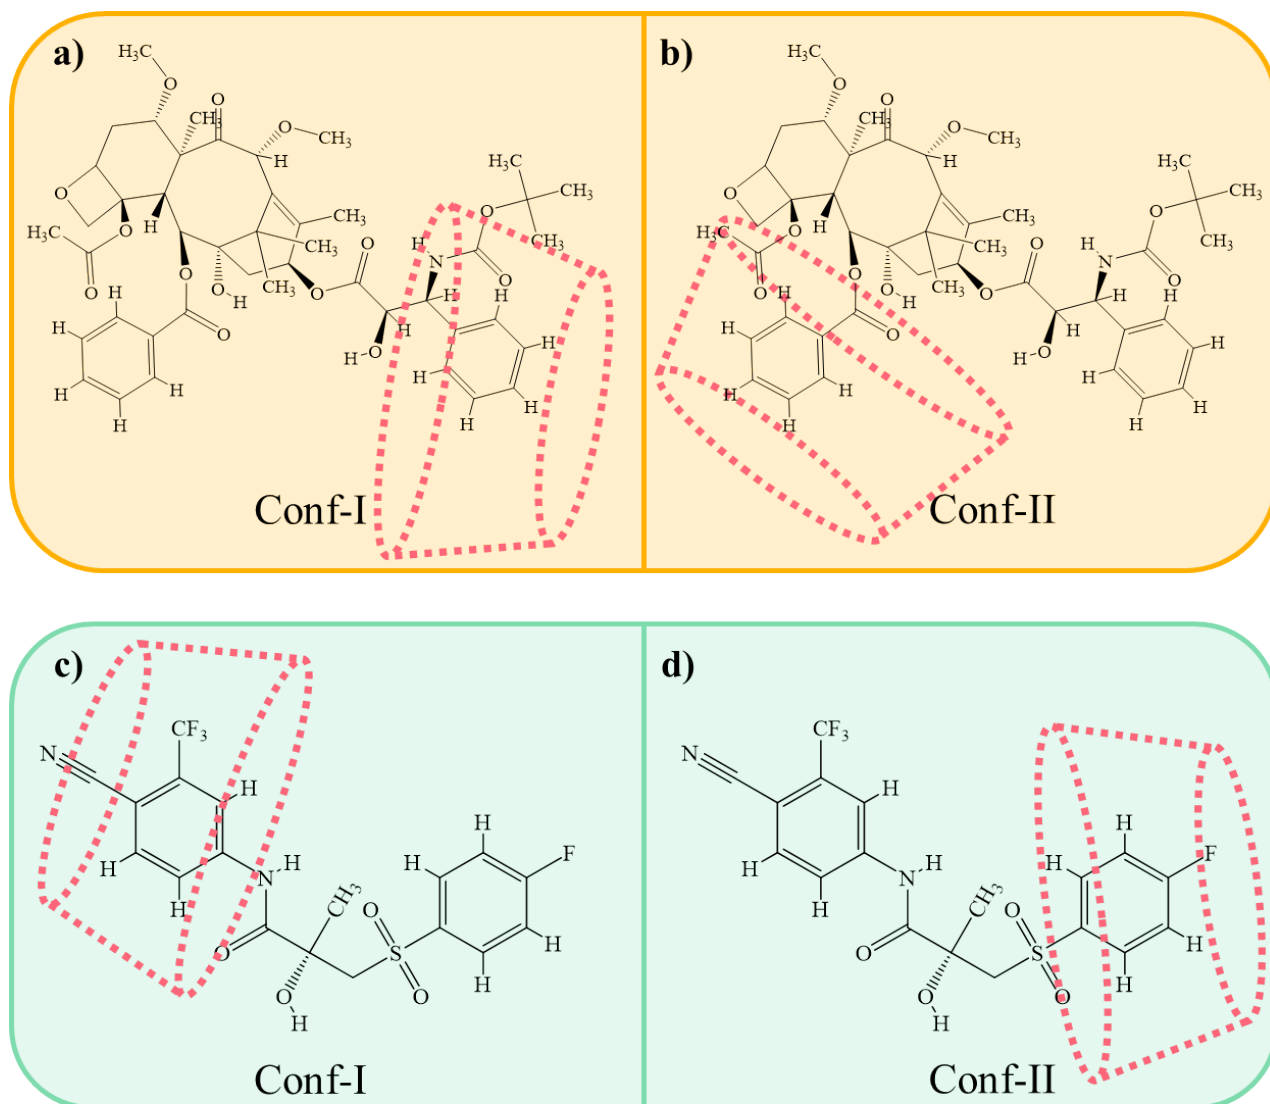

Figure S5 Schematics of the 1:1 molecular host-guest supramolecular complexes of  $\beta$ -CyD with a) and b) CBX (two structures investigated); c) and d) S-BIC (two structures investigated, same for R-BIC).



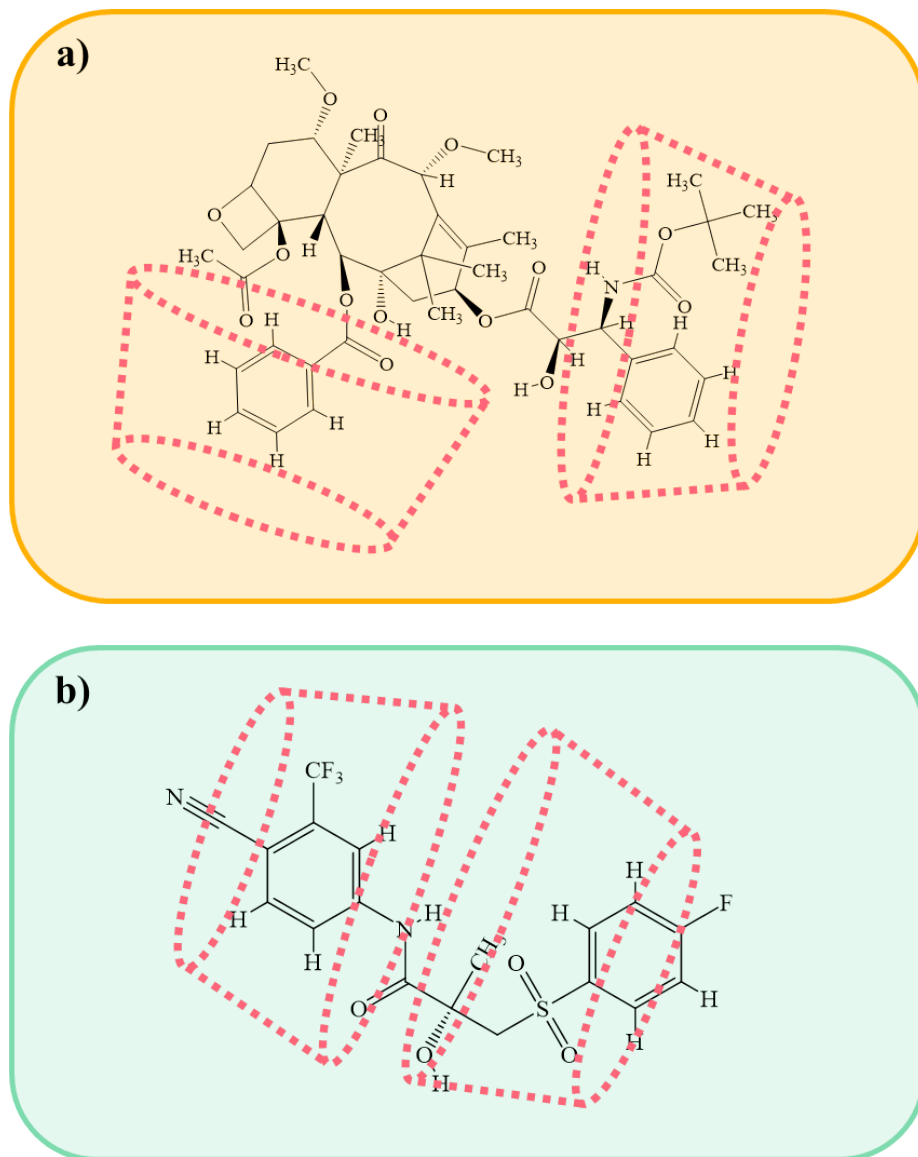

Figure S6 Schematics of the 1:2 molecular host-guest supramolecular complexes of two  $\beta$ -CyD with a) CBX; b) S-BIC (same for R-BIC).

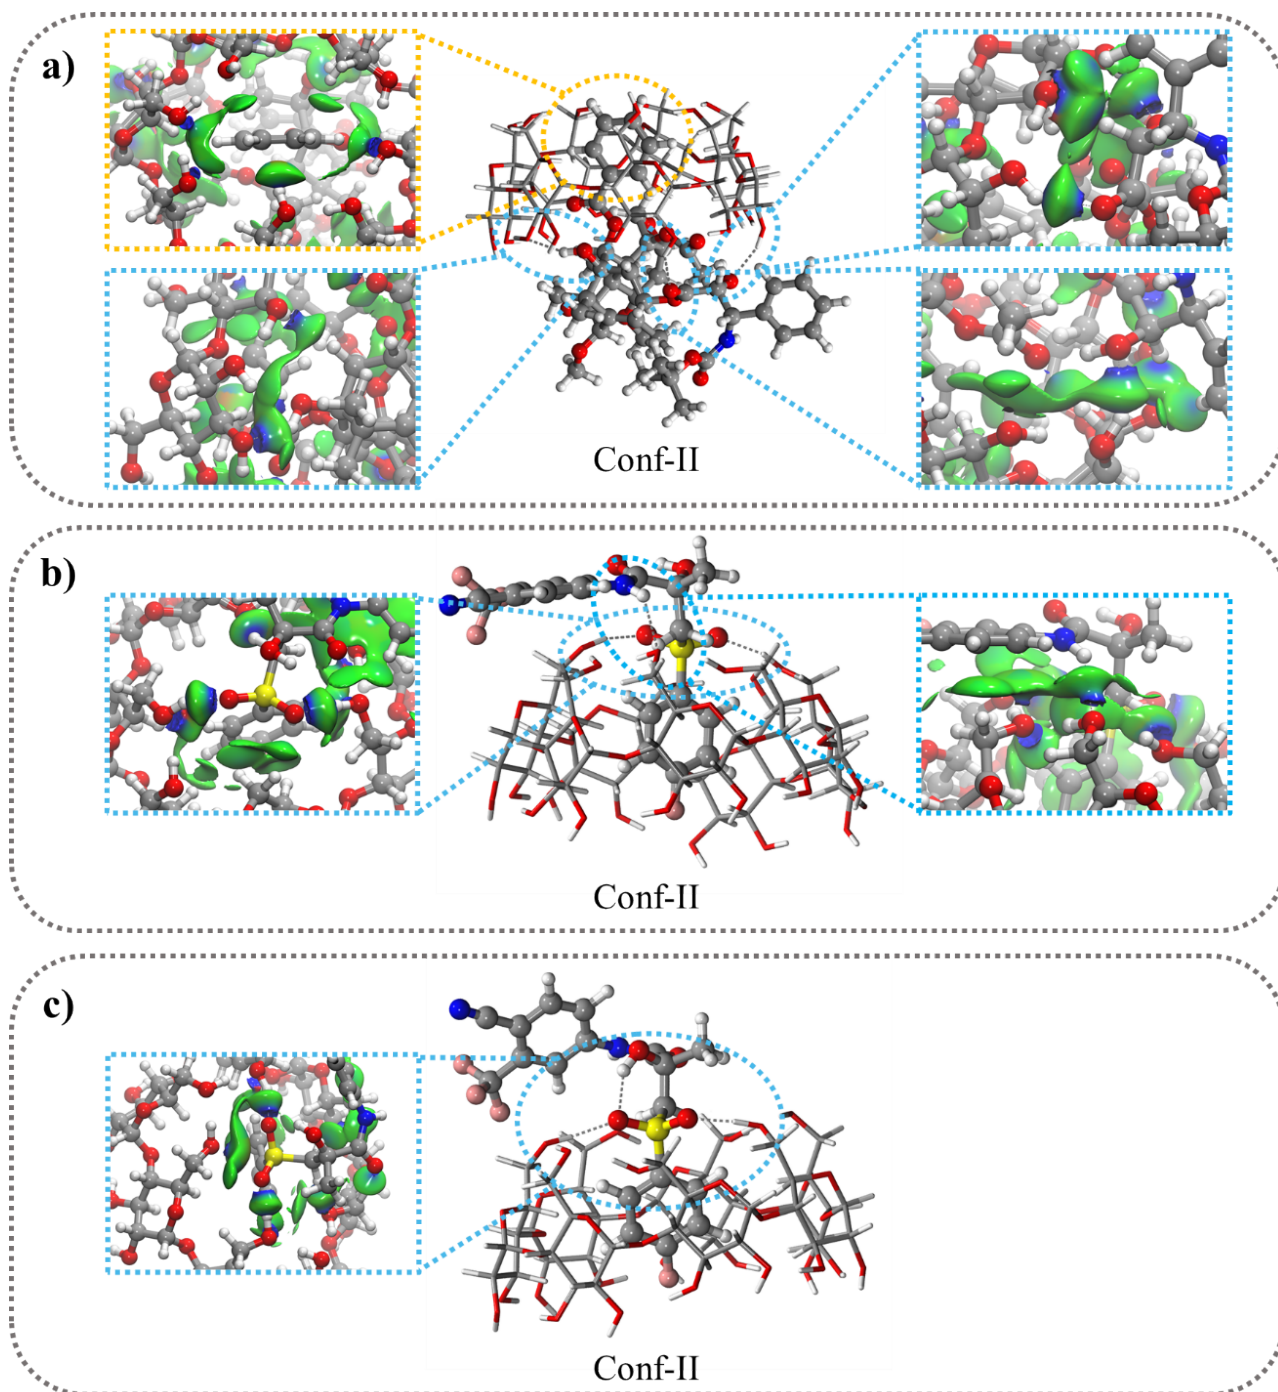

Figure S7 Optimized structures for 1:1 stoichiometry (Conf II) of  $\beta$ CyD and: a) CBX; b) S-BIC; c) R-BIC; with color-filled  $\delta g^{\text{inter}}(\rho)$  projections (isovalue 0.0055 a.u.). vdW and HBs interactions are highlighted by yellow and blue circle respectively.

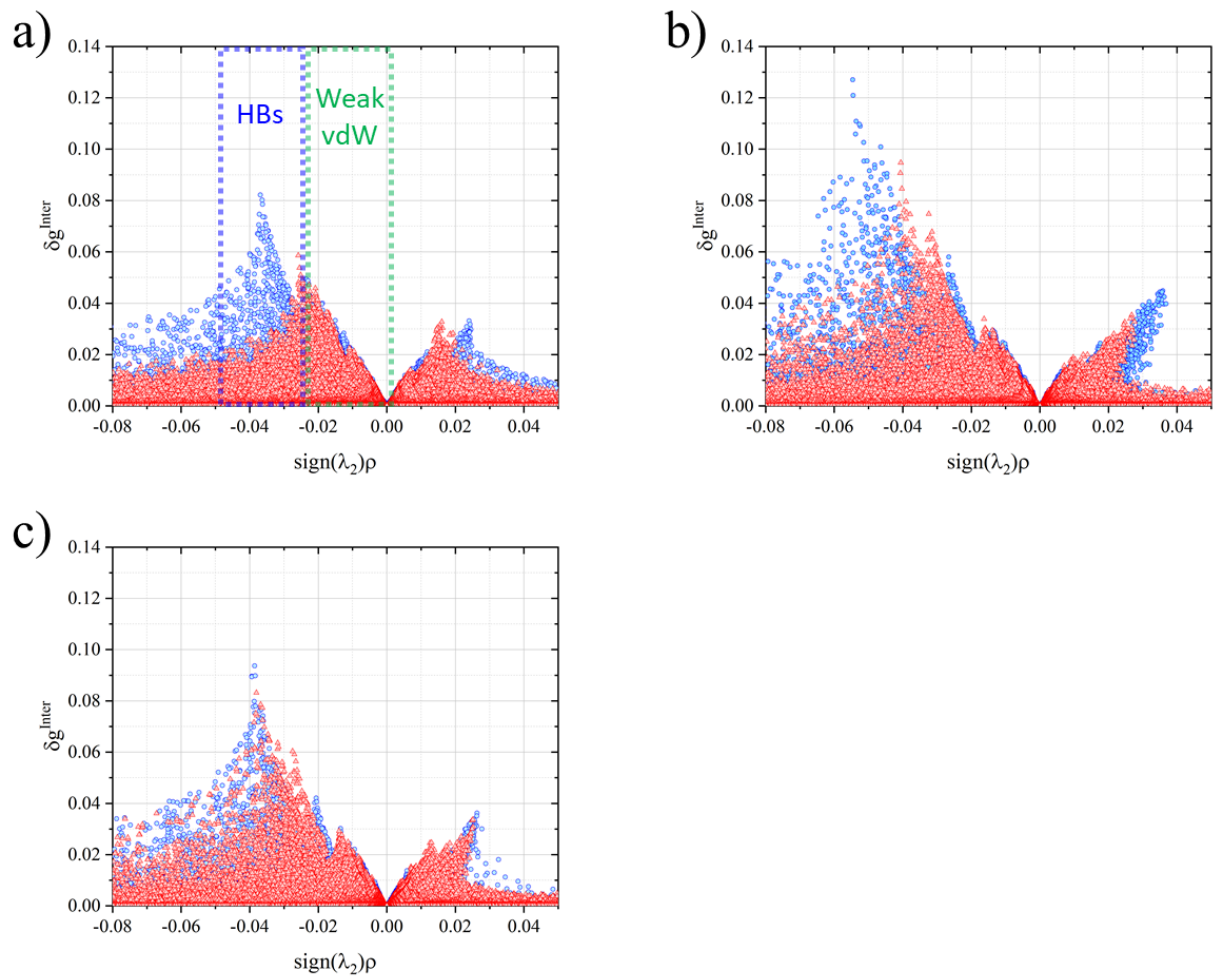

Figure S8  $\Delta g^{\text{inter}}$  plot for 1:1 stoichiometry of  $\beta\text{CyD}$  and: a) CBX (blue circle Conf-I; red triangle Conf-II); b) S-BIC (blue circle Conf-I; red triangle Conf-II); c) R-BIC (blue circle Conf-I; red triangle Conf-II).

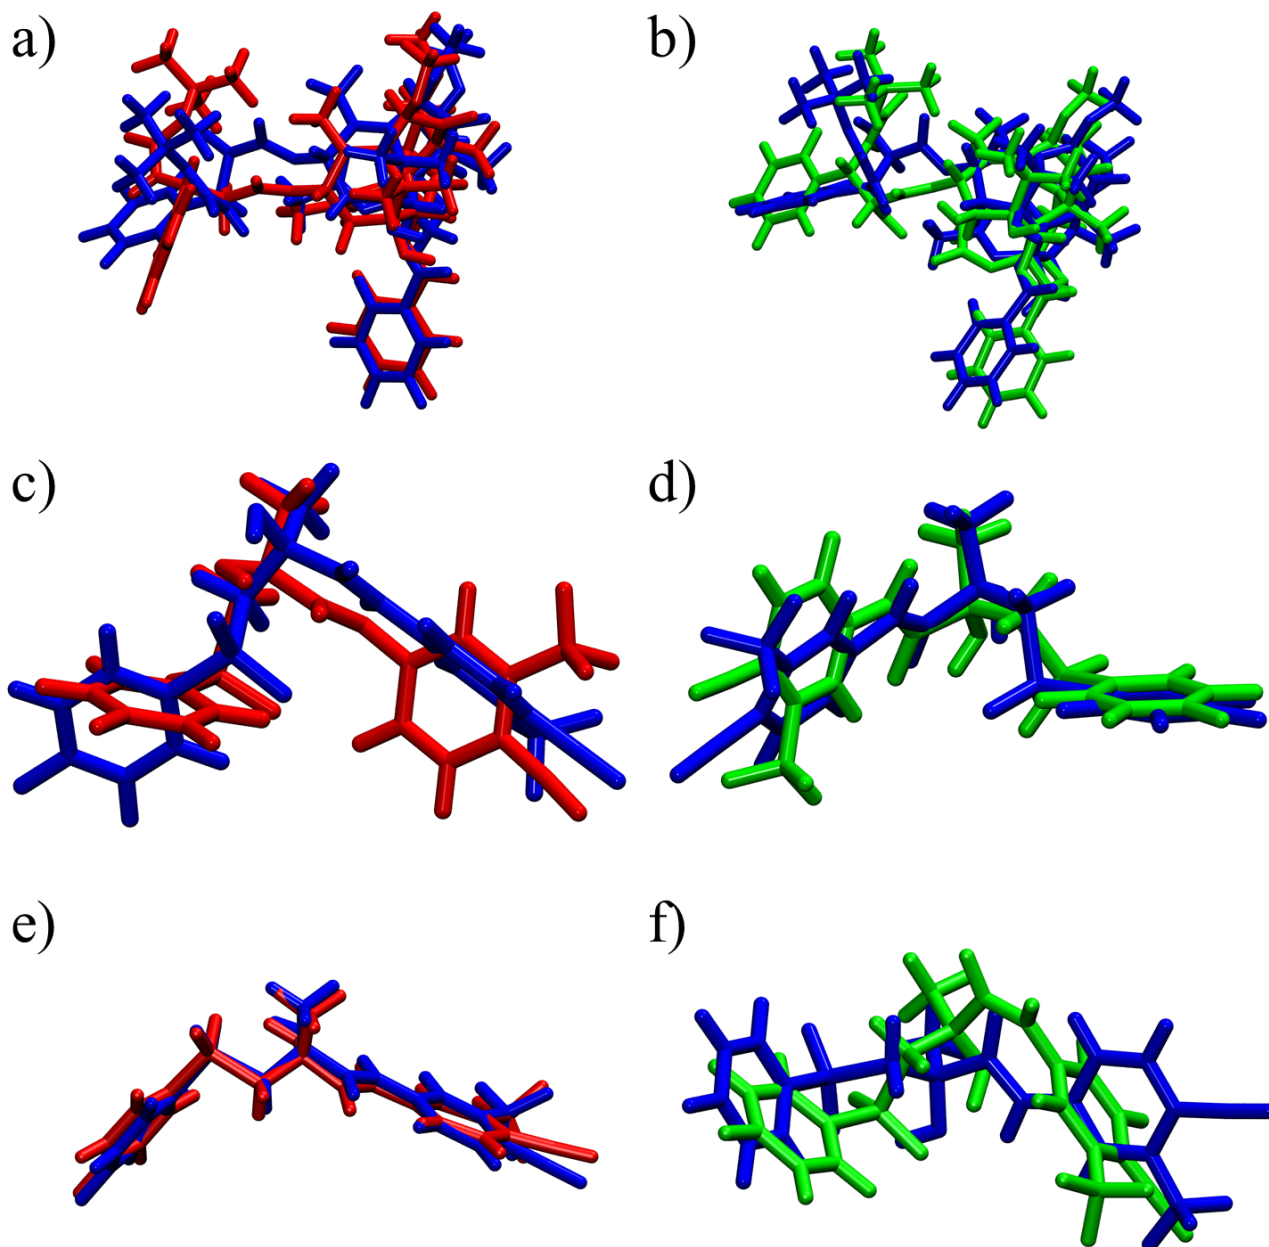

Figure S9 comparison between relax structure of guest molecules (blue) and guest molecules in Conf-I (red) and Conf-II complexes (green); a) and b) CBX; c) and d) S-BIC; e) and f) R-BIC.

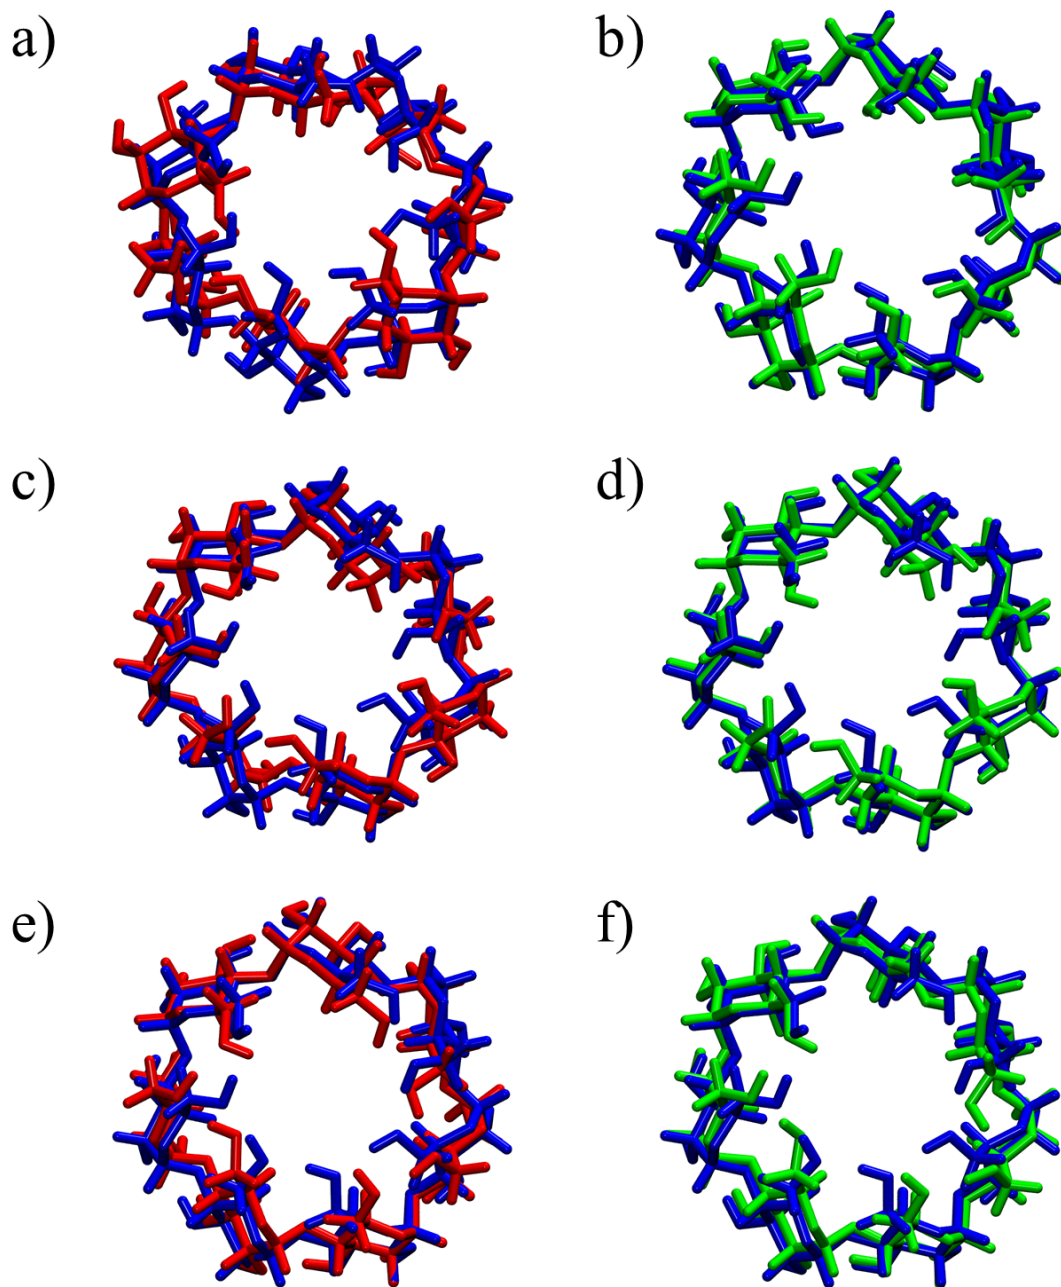

Figure S10 comparison between relax structure of  $\beta$ CyD molecule (blue) and  $\beta$ CyD molecules in Conf-I (red) and Conf-II complexes (green); a) and b) CBX@ $\beta$ CyD; c) and d) S-BIC@ $\beta$ CyD; e) and f) R-BIC@ $\beta$ CyD.

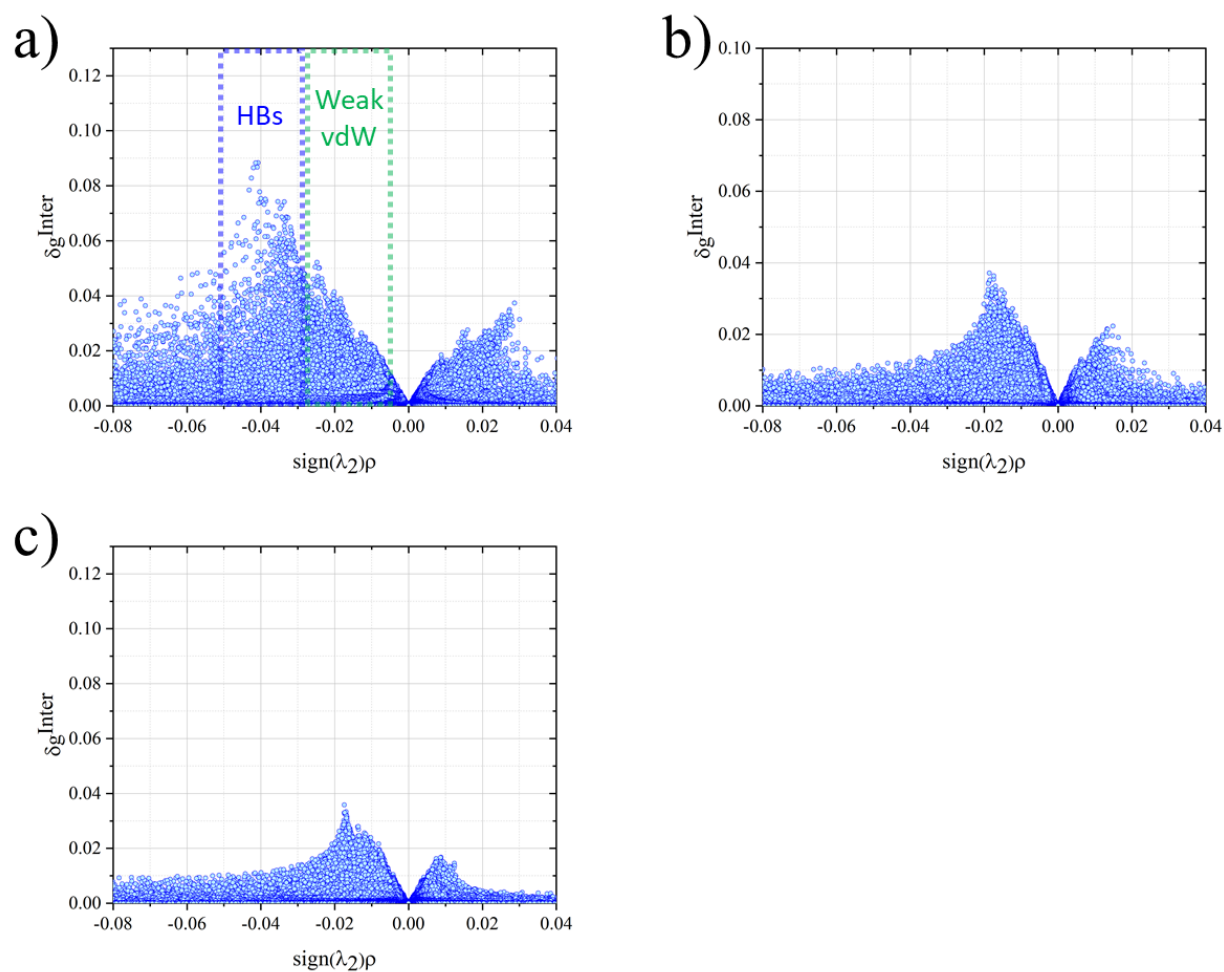

Figure S11  $\delta g^{\text{inter}}$  plot for 1:2 stoichiometry of  $\beta\text{CyD}$  with: a) CBX; b) S-BIC; c) R-BIC.

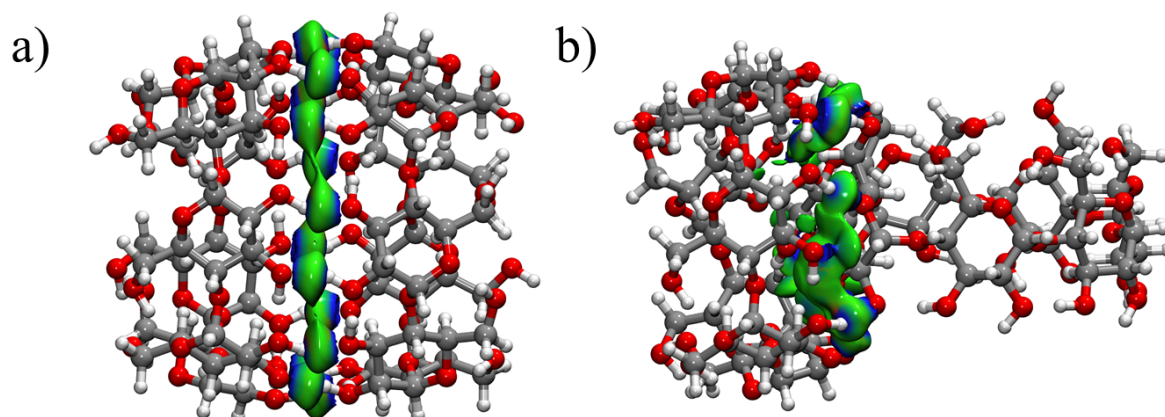

Figure S12 Optimization structures of cluster formed by 2  $\beta\text{CyD}$  without out guest molecules with color-filled  $\delta g^{\text{inter}}(\rho)$  plot (isovalue 0.0055 a.u.); structure a) is related to the relaxation of cluster formed with BIC; structure b) is related to the relaxation of cluster formed with CBX.

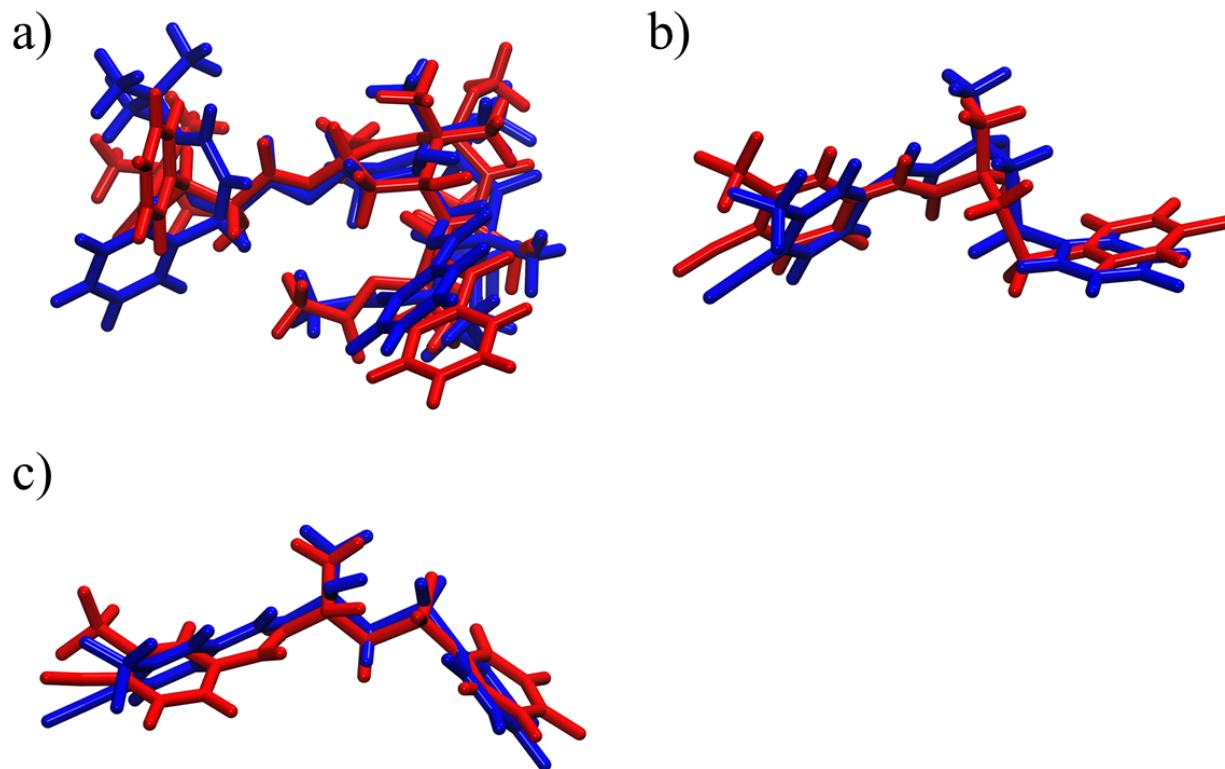

Figure S13 comparison between relax structure of guest molecules (blue) and guest molecules (red) in complexes; a) CBX; b) S-BIC; c) R-BIC.

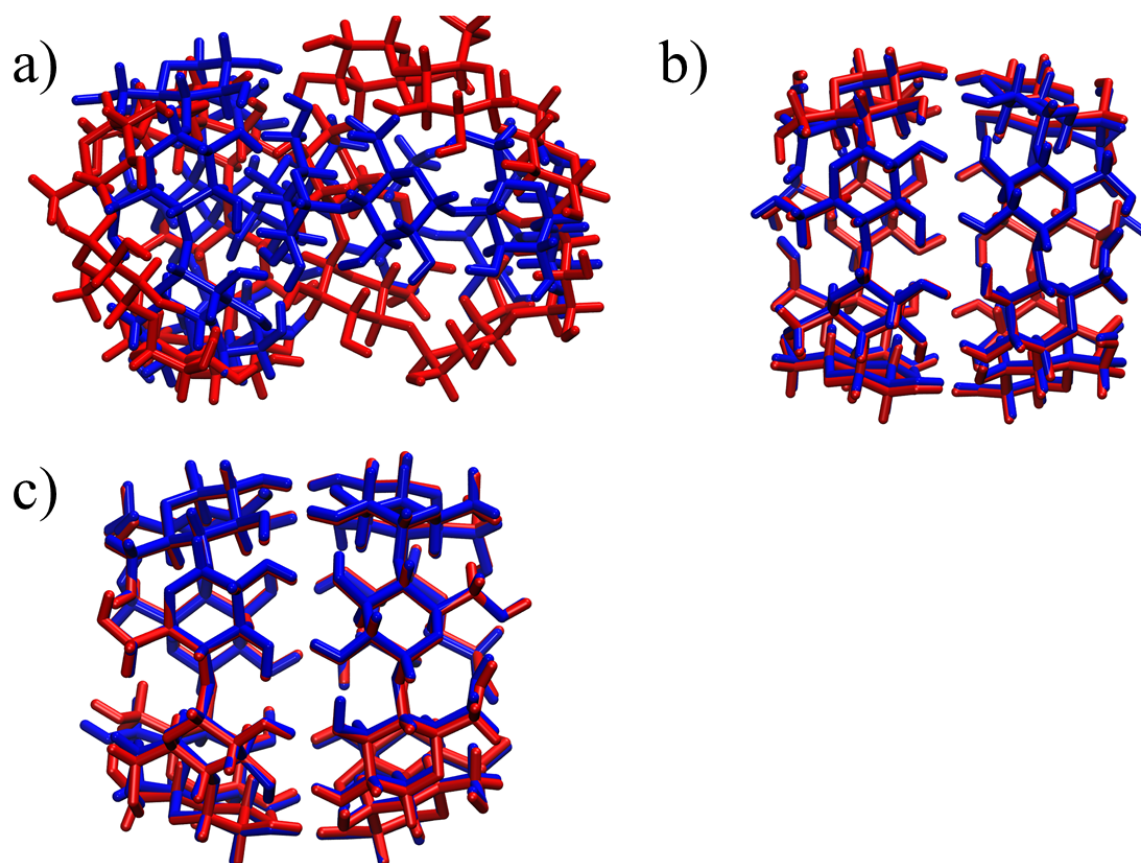

Figure S14 comparison between relax structure of  $\beta$ CyD molecule (blue) and  $\beta$ CyD molecules in complexes; a) CBX@ $\beta$ CyD; b) S-BIC@ $\beta$ CyD; c) R-BIC@ $\beta$ CyD.

**Table S2.** Absorption data:  $\lambda$ ,  $f$  (oscillator strength) and  $R$  (optical rotatory strength) for the first 5 states.

| State | R-BIC               |       |        | S-BIC               |       |        | CBX               |      |        |
|-------|---------------------|-------|--------|---------------------|-------|--------|-------------------|------|--------|
|       | $\lambda$ (nm)      | $f$   | $R$    | $\lambda$ (nm)      | $f$   | $R$    | $\lambda$ (nm)    | $f$  | $R$    |
| 1     | 256.0               | 0.567 | 55.19  | 256.0               | 0.566 | -55.40 | 288.7             | 0.00 | -35.29 |
| 2     | 243.9               | 0.118 | 5.30   | 243.9               | 0.118 | -5.37  | 240.7             | 0.03 | -2.55  |
| 3     | 229.8               | 0.008 | 2.81   | 229.9               | 0.008 | -2.62  | 226.5             | 0.01 | -10.47 |
| 4     | 228.1               | 0.000 | -0.45  | 228.1               | 0.000 | 0.45   | 226.5             | 0.00 | 0.23   |
| 5     | 206.1               | 0.173 | -15.19 | 206.1               | 0.173 | 15.17  | 222.1             | 0.31 | 24.44  |
|       | 2 $\beta$ Cyd-R-BIC |       |        | 2 $\beta$ Cyd-S-BIC |       |        | 2 $\beta$ Cyd-CBX |      |        |
| 1     | 260.2               | 0.507 | -35.53 | 258.2               | 0.455 | 5.74   | 291.7             | 0.00 | -41.76 |
| 2     | 250.0               | 0.066 | 0.53   | 246.6               | 0.087 | -0.78  | 244.0             | 0.26 | -0.30  |
| 3     | 234.7               | 0.006 | 2.36   | 230.9               | 0.001 | 97.62  | 231.4             | 0.01 | 0.35   |
| 4     | 231.5               | 0.007 | -14.87 | 223.6               | 0.006 | -19.28 | 230.9             | 0.00 | -7.66  |
| 5     | 210.6               | 0.171 | 51.18  | 209.8               | 0.114 | 18.38  | 225.7             | 0.27 | -6.69  |



## 7) Titration data analysis of Ce6 with pbCyD

Figure S15: Output for the binding analysis of the Absorption and Fluorescence spectra and global analysis of the fluorescence decay of Ce6 with different polymer amounts

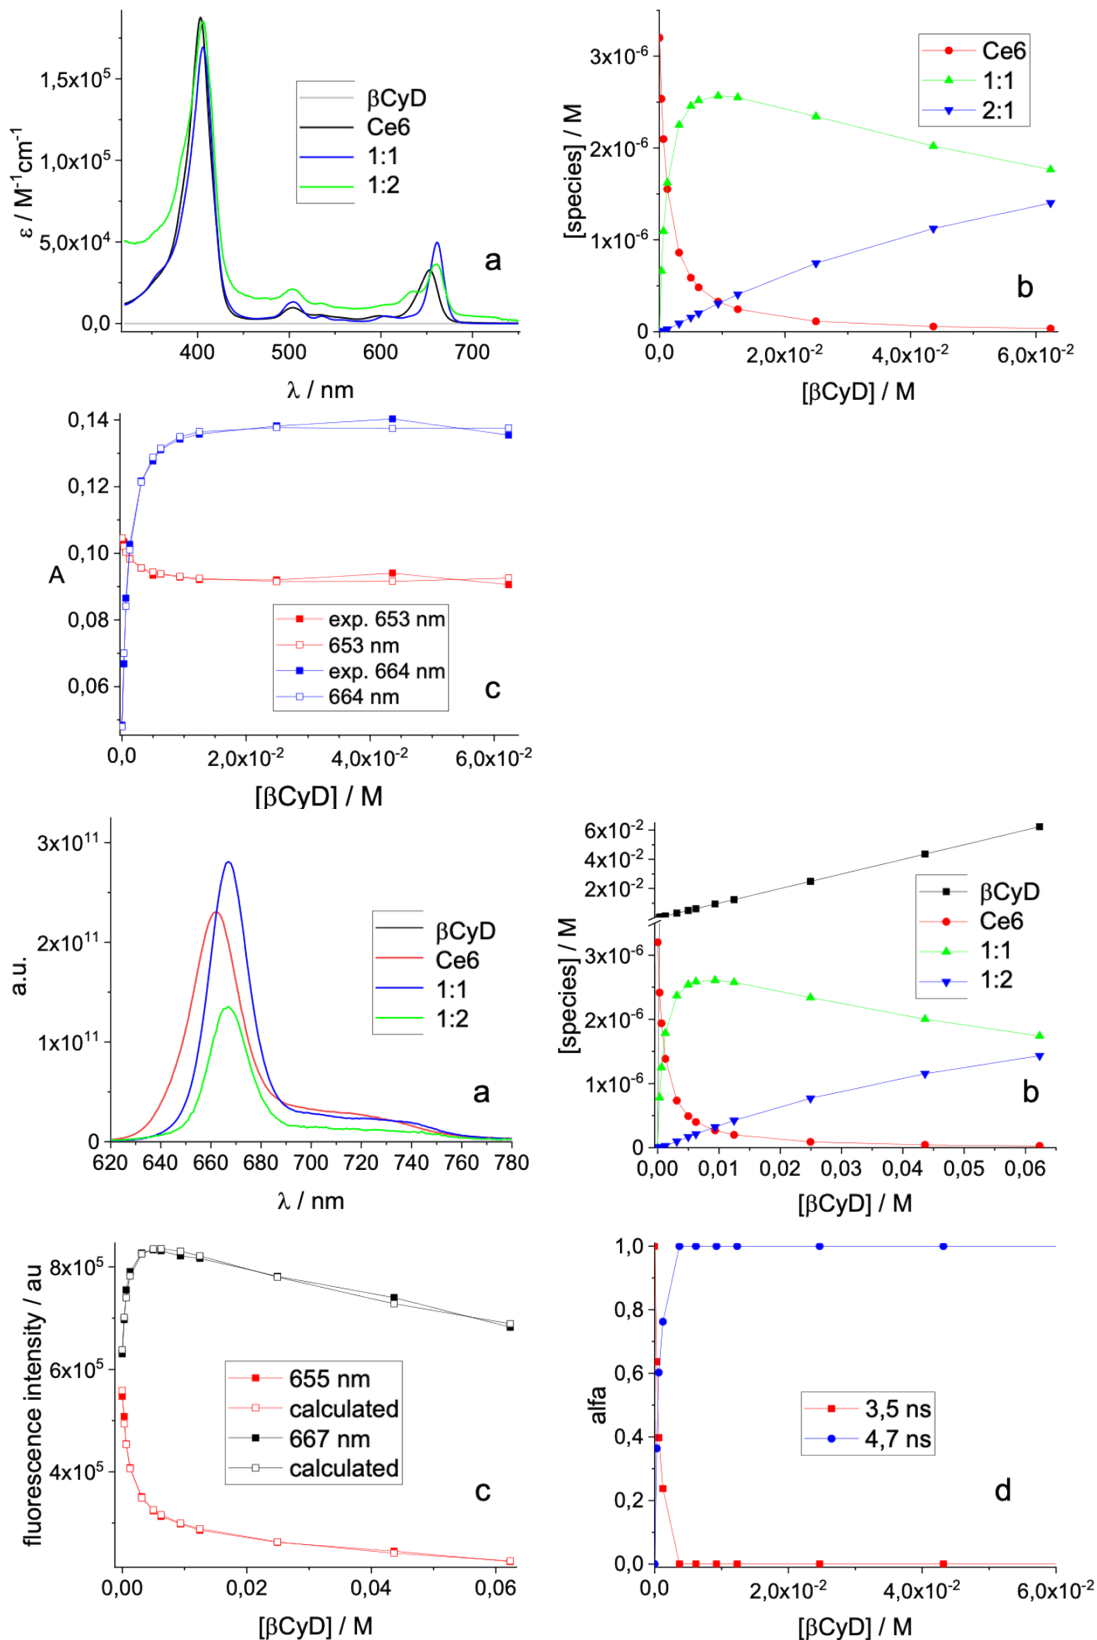

## 8) co-encapsulation of BIC and CBX

Figure S16: stability test of the mixtures

Absorption spectra of BIC with  $\beta$ CyD (blue),  $\alpha\beta$ CyD (red) and  $\alpha\beta$ CyD (green) measured at time 0 (lines) and after 28 days (dashed).

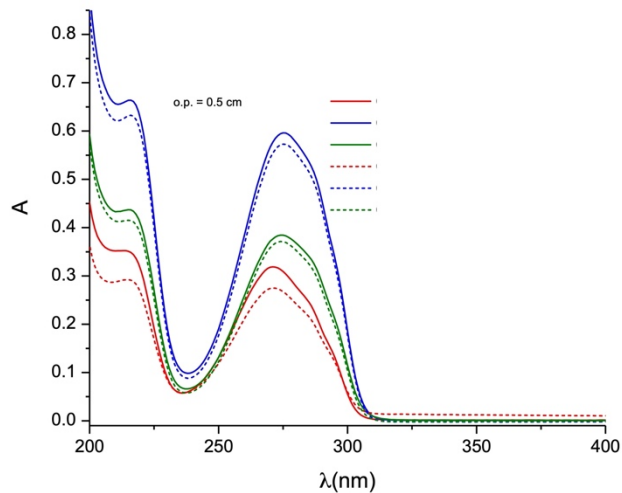

Absorption spectra of CBX with  $\beta$ CyD (blue),  $\alpha\beta$ CyD (red) and  $\alpha\beta$ CyD (green) measured at time 0 (lines) and after 28 days (dashed).

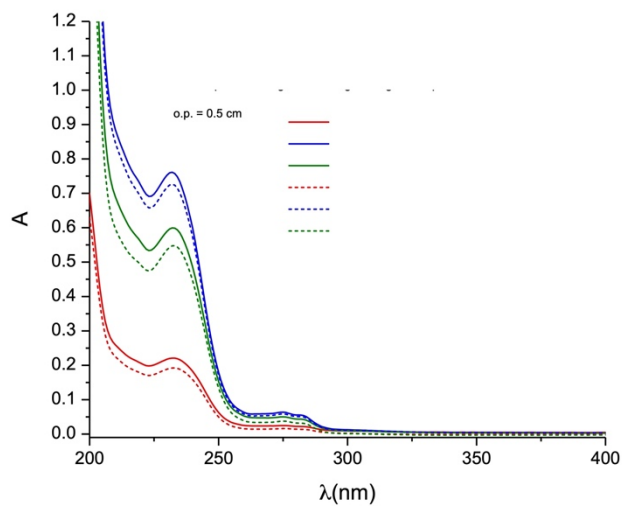

Absorption spectra of CBX and BIC with  $\beta$ CyD (blue),  $\alpha\beta$ CyD (red) and  $\alpha\beta$ CyD (green) measured at time 0 (lines) and after 28 days (dashed).

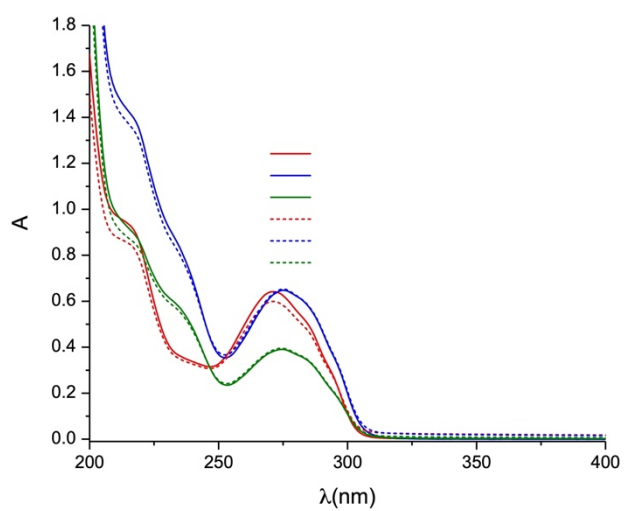

Figure S17: results for the global analysis of the fluorescence decay of Ce6 in the presence of different amounts of polymer and CBX

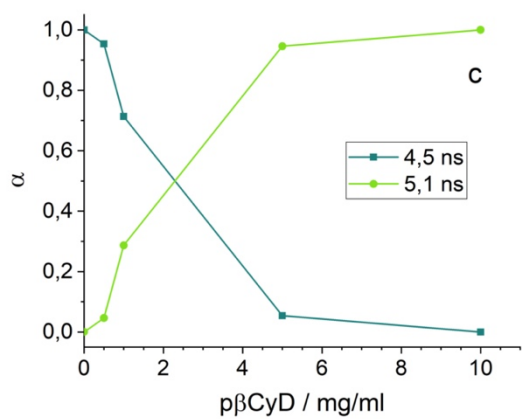

Supplement: d3ra01782f1.pdf [file d3ra01782f1.pdf]
